# Supplementary material for: Farmers Feel the Climate Change: Variety Choice as an Adaptation Strategy of European Potato Farmers
Source: MDPI journal article supplement (doi:10.3390/cli11090189), 2023-09-09

## S2: Detailed Answers

### Set 1: European potato farmers' perception of climatic changes and experienced impact on potato production.

Q1: Do you believe that in the last 10 years changes in climatic conditions have affected your potato production?

|       | n   | %     |
|-------|-----|-------|
| yes   | 493 | 89.2  |
| no    | 60  | 10.8  |
| total | 553 | 100.0 |

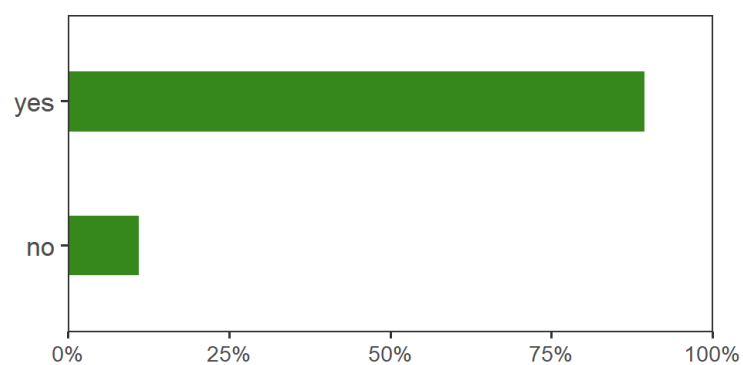

Q2 (additional, only if Q1 was answered with yes) & Q3: Which effect(s) related to climatic changes do you feel has (have) increasingly impacted your potato production in the last 10 years? In your opinion, which effect(s) related to climatic changes will negatively affect your future crop production the most? (Multiple choice)

|                                                    | Last 10 years<br>(N=493) |      | Future<br>(N=553) |      |
|----------------------------------------------------|--------------------------|------|-------------------|------|
|                                                    | n                        | %    | n                 | %    |
| drought                                            | 431                      | 87.4 | 438               | 79.2 |
| heat                                               | 407                      | 82.6 | 405               | 73.2 |
| pests and pathogens induced by climatic conditions | 263                      | 53.3 | 285               | 51.5 |
| heavy precipitation                                | 210                      | 42.6 | 208               | 37.6 |
| late spring frosts                                 | 76                       | 15.4 | 56                | 10.1 |
| flash floods                                       | 62                       | 12.6 | 55                | 9.9  |
| soil erosion                                       | 47                       | 9.5  | 50                | 9.0  |
| others                                             | 33                       | 6.7  | 38                | 6.9  |
| early autumn frosts                                | 6                        | 1.2  | 9                 | 1.6  |

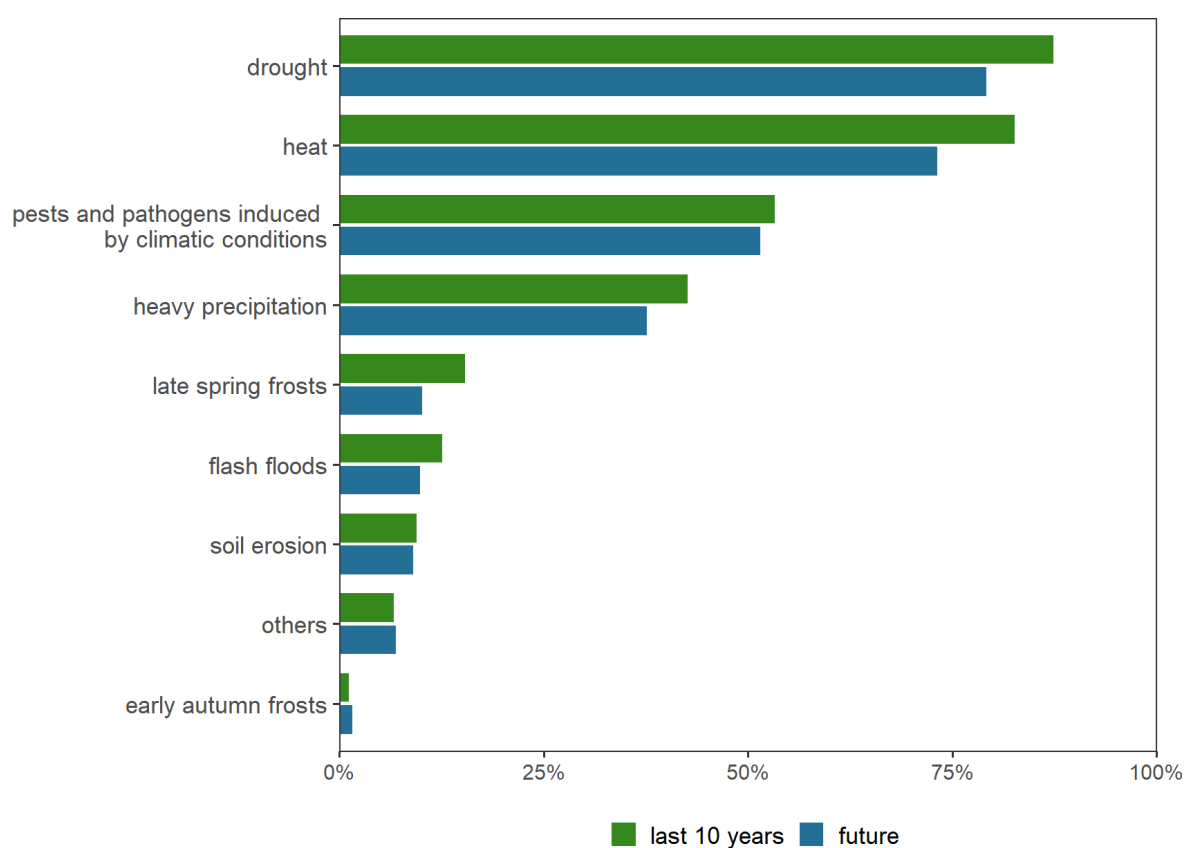

Q4: Do you believe climatic changes are a threat to maintain potato production at your farm?

|        | n   | %     |
|--------|-----|-------|
| yes    | 264 | 47.7  |
| no     | 133 | 24.1  |
| unsure | 156 | 28.2  |
| total  | 553 | 100.0 |

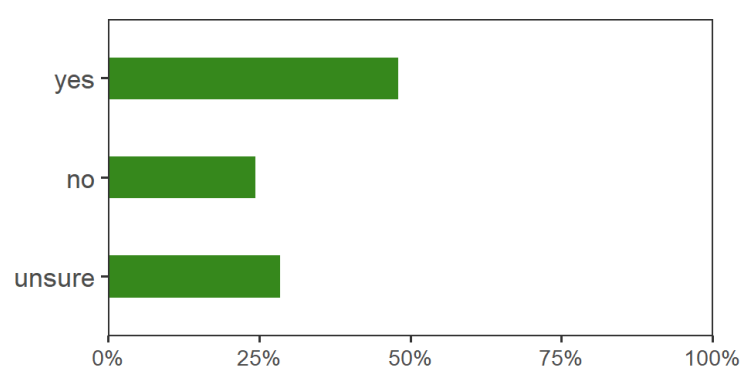

## Set 2: European potato farmers' pursued adaptation strategies and in-depth information about adaptation strategy "variety choice".

Q5: Which adaptation strategies to climate changes are you willing to implement? (Multiple choice)

| N=553                                                             | n   | %    |
|-------------------------------------------------------------------|-----|------|
| planting an adapted variety                                       | 405 | 73.2 |
| irrigation                                                        | 248 | 44.8 |
| change of planting and harvesting date                            | 247 | 44.7 |
| tillage                                                           | 243 | 43.9 |
| change in crop rotation                                           | 177 | 32.0 |
| planting an adapted genetically modified or genome edited variety | 137 | 24.8 |
| others                                                            | 24  | 4.3  |

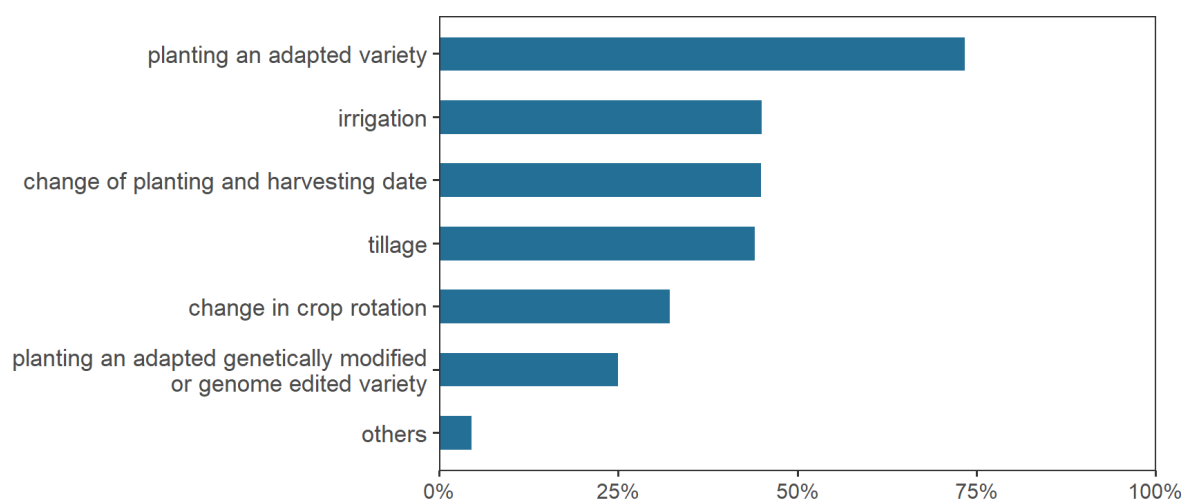

Q6: Do you believe that the impact of climatic changes on potato production can be reduced by the choice of an adapted variety?

|          | n   | %     |
|----------|-----|-------|
| agree    | 409 | 74.0  |
| disagree | 32  | 5.8   |
| unsure   | 112 | 20.3  |
| total    | 553 | 100.0 |

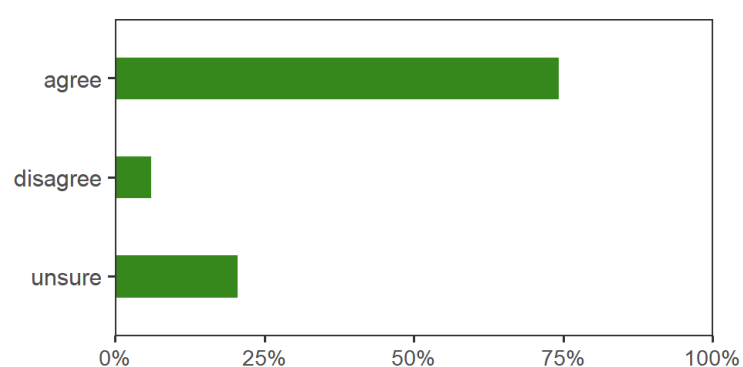

Q7: Which source of information do you use in your choice of variety? (Multiple choice)

| <b>N=553</b>                            | <b>n</b> | <b>%</b> |
|-----------------------------------------|----------|----------|
| personal experience                     | 449      | 81.2     |
| discussion with colleagues              | 317      | 57.3     |
| breeding companies                      | 211      | 38.2     |
| plant variety examination offices       | 185      | 33.5     |
| technical associations or institutes    | 177      | 32.0     |
| processors                              | 169      | 30.6     |
| retailers                               | 157      | 28.4     |
| farmers' representatives / associations | 116      | 21.0     |
| agricultural fairs                      | 85       | 15.4     |
| others                                  | 42       | 7.6      |

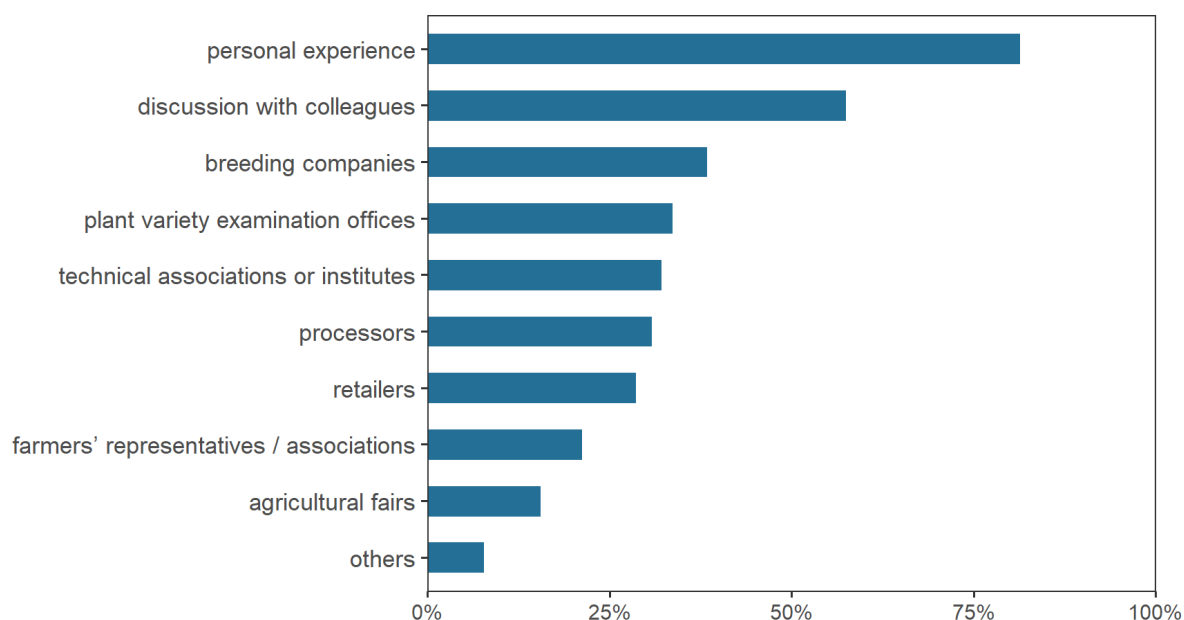

Q8 (optional): How important do you consider these characteristics for the choice of an adapted variety?

| data in %                | n   | 1 - very relevant | 2    | 3    | 4 - not relevant | unsure |
|--------------------------|-----|-------------------|------|------|------------------|--------|
| yield potential          | 545 | 51.9              | 34.9 | 10.8 | 2.0              | 0.4    |
| yield stability          | 543 | 63.9              | 27.8 | 5.9  | 2.2              | 0.2    |
| skin and flesh color     | 524 | 18.3              | 29.4 | 26.9 | 24.4             | 1.0    |
| tuber shape              | 531 | 16.8              | 42.7 | 26.4 | 13.0             | 1.1    |
| time of maturity         | 530 | 19.2              | 46.0 | 27.0 | 6.2              | 1.5    |
| disease resistance       | 546 | 62.5              | 27.1 | 7.0  | 2.9              | 0.5    |
| pest resistance          | 536 | 56.2              | 27.4 | 12.3 | 3.4              | 0.7    |
| starch content           | 526 | 14.1              | 32.7 | 35.9 | 15.2             | 2.1    |
| sugar content            | 505 | 5.7               | 25.7 | 39.8 | 24.4             | 4.4    |
| dormancy and storability | 539 | 40.6              | 40.1 | 13.9 | 4.8              | 0.6    |
| drought tolerance        | 541 | 53.2              | 35.9 | 8.1  | 2.2              | 0.6    |
| heat tolerance           | 543 | 56.7              | 33.0 | 7.2  | 2.6              | 0.6    |

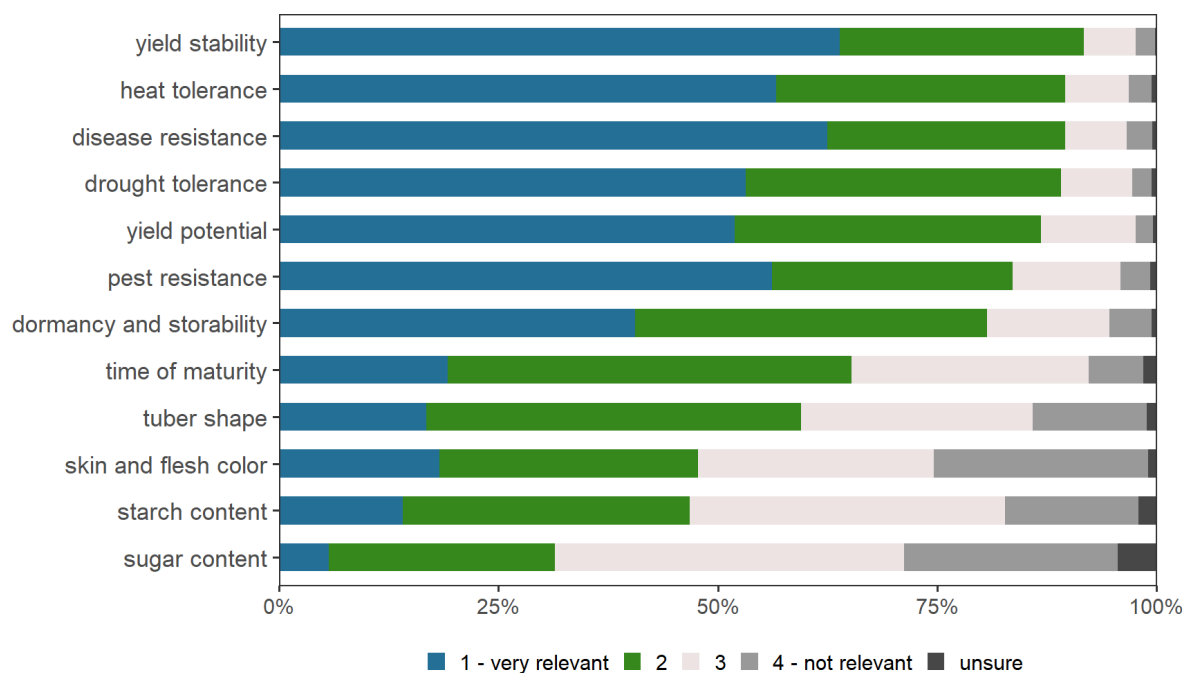

Variables are sorted by number of answers of value 1 plus 2 (green bar).



### Set 3: Information about site conditions and survey participants

Q9: Which farming system applies to your potato production?

|              | n   | %     |
|--------------|-----|-------|
| conventional | 417 | 75.4  |
| organic      | 77  | 13.9  |
| mixed        | 49  | 8.9   |
| others       | 10  | 1.8   |
| total        | 553 | 100.0 |

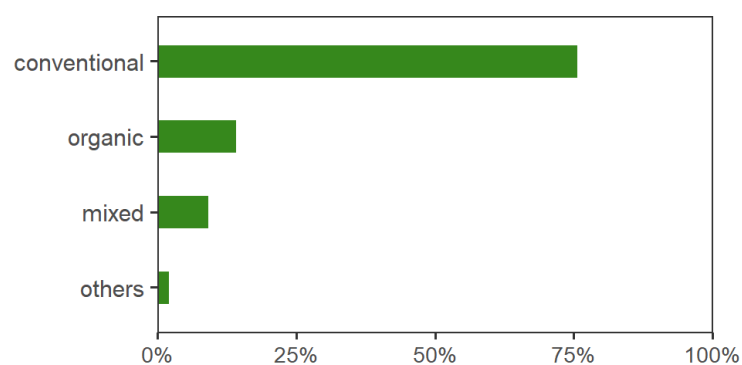

Q10: Your main production target(s). (Multiple choice)

| N=553                               | n   | %    |
|-------------------------------------|-----|------|
| table potatoes                      | 347 | 62.7 |
| processing industry for consumption | 178 | 32.2 |
| seed potatoes                       | 171 | 30.9 |
| starch industry                     | 103 | 18.6 |

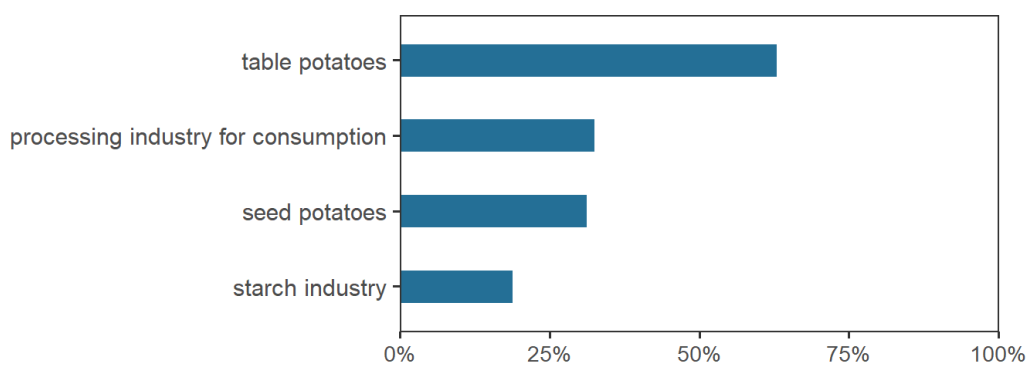

### Q11: Potato acreage

|              | n   | %     |
|--------------|-----|-------|
| < 3 ha       | 115 | 20.8  |
| 3 - 8 ha     | 82  | 14.8  |
| 9 - 20 ha    | 122 | 22.1  |
| 21 - 50 ha   | 126 | 22.8  |
| 51 - 100 ha  | 57  | 10.3  |
| 101 - 150 ha | 22  | 4.0   |
| > 150 ha     | 29  | 5.2   |
| total        | 553 | 100.0 |

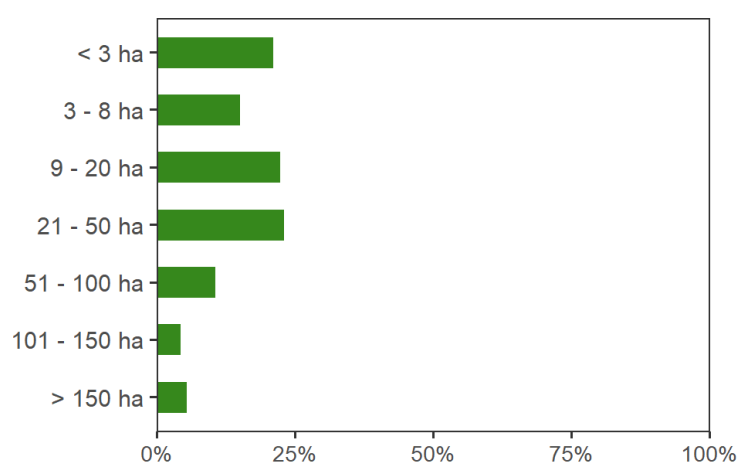

## Q12: Possibility of irrigation

|           | n   | %     |
|-----------|-----|-------|
| yes       | 192 | 34.7  |
| no        | 273 | 49.4  |
| partially | 88  | 15.9  |
| total     | 553 | 100.0 |

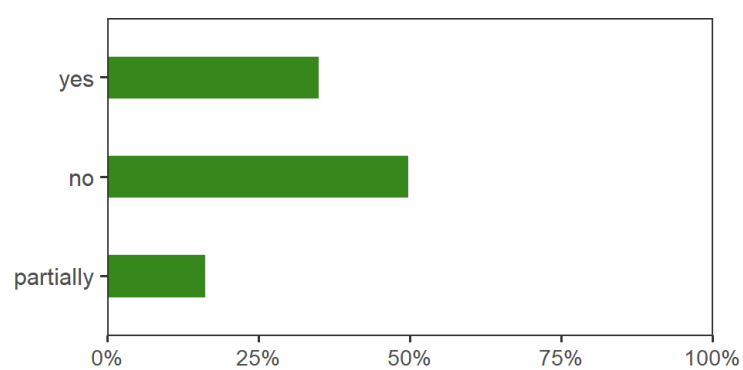

### Q13: Soil water retention capacity

|               | n   | %     |
|---------------|-----|-------|
| low           | 43  | 7.8   |
| low - medium  | 110 | 19.9  |
| medium        | 245 | 44.3  |
| medium - high | 105 | 19.0  |
| high          | 37  | 6.7   |
| unsure        | 13  | 2.4   |
| total         | 553 | 100.0 |

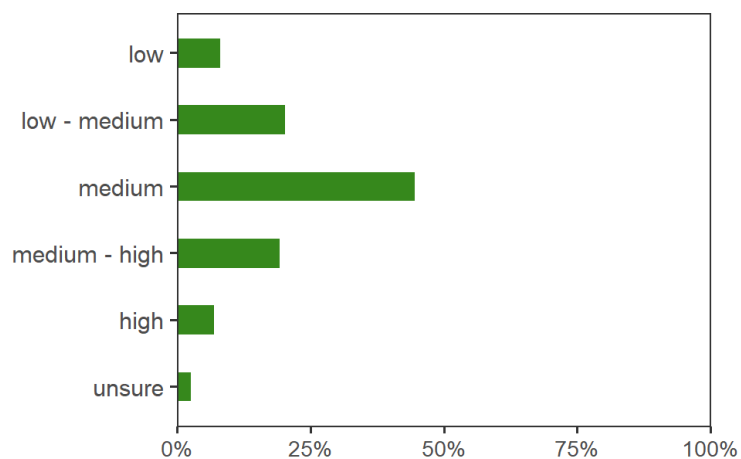

### Q14: Medium annual precipitation

|              | n   | %     |
|--------------|-----|-------|
| < 300 mm     | 10  | 1.8   |
| 300 – 500 mm | 115 | 20.8  |
| 500 – 700 mm | 196 | 35.4  |
| 700 - 900 mm | 146 | 26.4  |
| > 900 mm     | 46  | 8.3   |
| unsure       | 40  | 7.2   |
| total        | 553 | 100.0 |

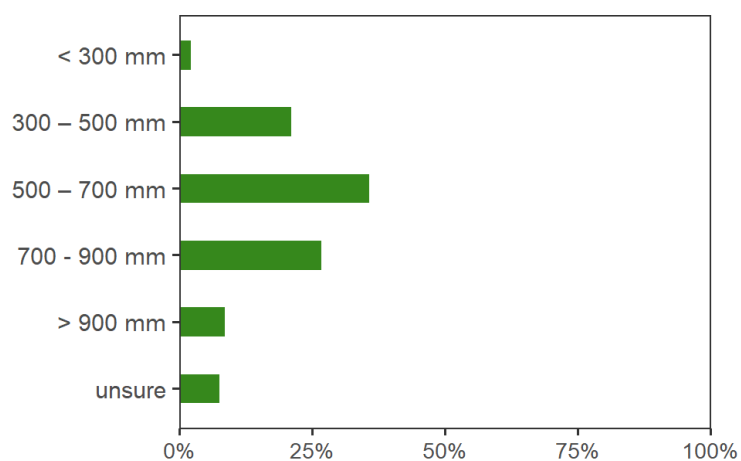

Q15 & Q16: Probability of maximum temperature >26 °C for more than 7 days during growing period (left). Probability of maximum temperature >30°C for more than 7 days during growing period (right).

|        | n<br>> 26°C | %<br>> 26°C | n<br>> 30°C | %<br>> 30°C |
|--------|-------------|-------------|-------------|-------------|
| high   | 361         | 65.3        | 175         | 31.6        |
| medium | 162         | 29.3        | 252         | 45.6        |
| low    | 17          | 3.1         | 108         | 19.5        |
| unsure | 13          | 2.4         | 18          | 3.3         |
| total  | 553         | 100.0       | 553         | 100.0       |

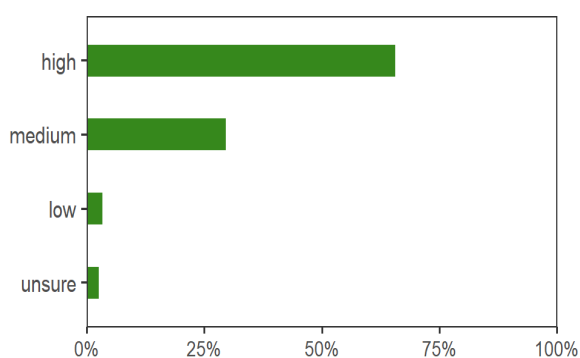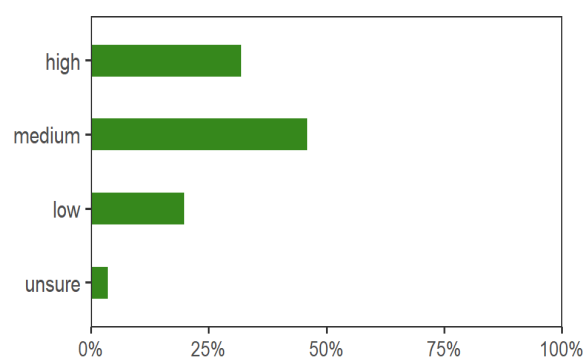

Q17: Where is your potato production located?

|                | n   | %     |
|----------------|-----|-------|
| Austria        | 159 | 28.75 |
| Netherlands    | 93  | 16.82 |
| Germany        | 79  | 14.29 |
| France         | 57  | 10.31 |
| Switzerland    | 53  | 9.58  |
| Slovenia       | 36  | 6.51  |
| Belgium        | 21  | 3.80  |
| Poland         | 19  | 3.44  |
| Spain          | 15  | 2.71  |
| United-Kingdom | 6   | 1.08  |
| Serbia         | 2   | 0.36  |
| Slovakia       | 2   | 0.36  |
| Greece         | 2   | 0.36  |
| Sweden         | 1   | 0.18  |
| Luxembourg     | 1   | 0.18  |
| Italy          | 1   | 0.18  |
| Ireland        | 1   | 0.18  |
| Hungary        | 1   | 0.18  |
| Estonia        | 1   | 0.18  |
| Denmark        | 1   | 0.18  |
| Czech Republic | 1   | 0.18  |
| Bulgaria       | 1   | 0.18  |
| total          | 553 | 100.0 |

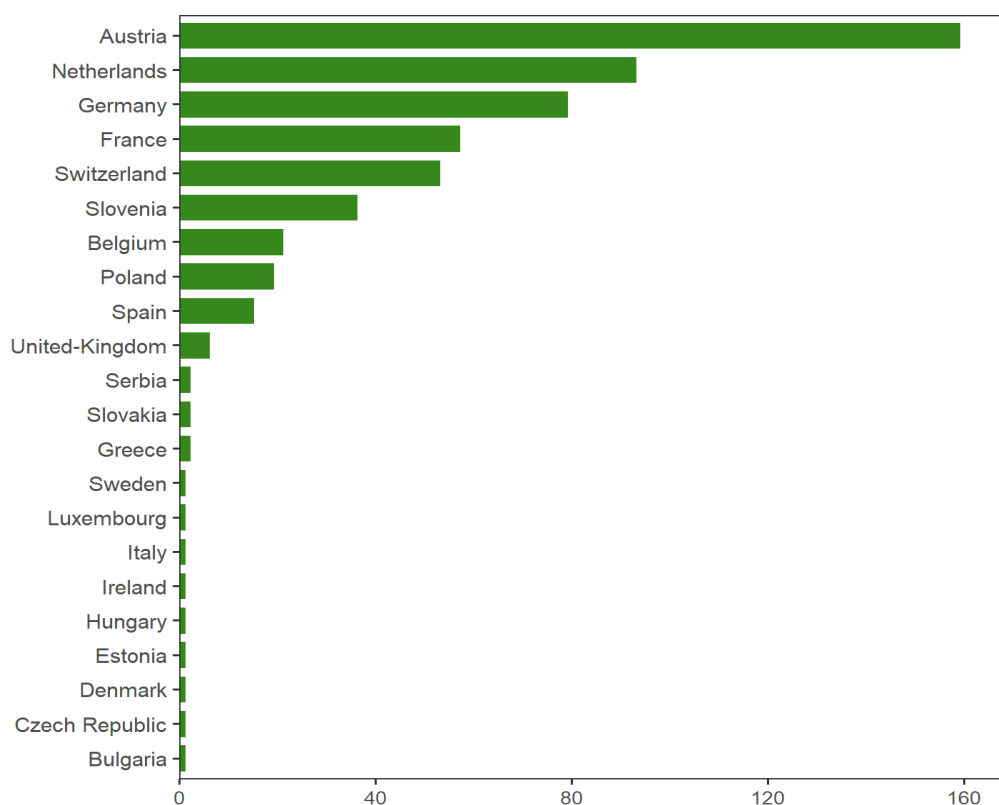

Q18: How long have you been growing potato?

|           | n   | %     |
|-----------|-----|-------|
| ≤ 5 years | 45  | 8.1   |
| > 5 years | 508 | 91.9  |
| total     | 553 | 100.0 |

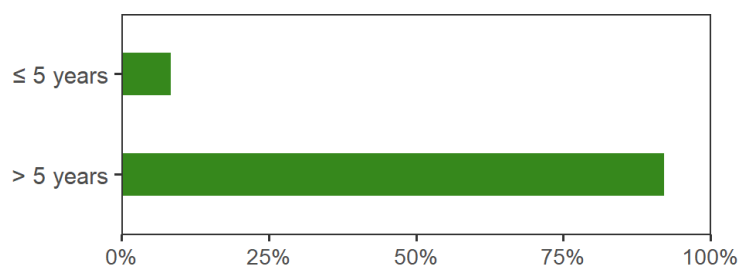

Q19: What is your age?

|            | n | %   |
|------------|---|-----|
| ≤ 24 years | 7 | 1.3 |

|               | n   | %     |
|---------------|-----|-------|
| 25 - 34 years | 75  | 13.6  |
| 35 - 44 years | 118 | 21.3  |
| 45 - 54 years | 159 | 28.8  |
| 55 - 64 years | 167 | 30.2  |
| ≥ 65 years    | 27  | 4.9   |
| total         | 553 | 100.0 |

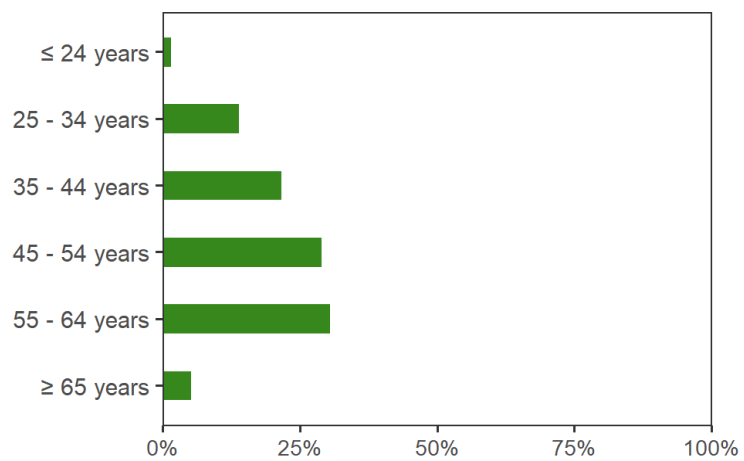

Supplement: s1 [file s1 › S2_Detailed Answers.pdf]
