# Supplementary material for: Farmers Feel the Climate Change: Variety Choice as an Adaptation Strategy of European Potato Farmers
Source: MDPI journal article supplement (doi:10.3390/cli11090189), 2023-09-09

**S3: Country-specific answers for Q7: Which source of information do you use in your choice of variety? (Multiple-choice, only countries with >10 replies)**

**Austria: Which source of information do you use in your choice of variety?**

| N=159                                   | n   | %    |
|-----------------------------------------|-----|------|
| personal experience                     | 134 | 84.3 |
| discussion with colleagues              | 116 | 73.0 |
| technical associations or institutes    | 63  | 39.6 |
| breeding companies                      | 56  | 35.2 |
| farmers' representatives / associations | 45  | 28.3 |
| plant variety examination offices       | 35  | 22.0 |
| processors                              | 35  | 22.0 |
| retailers                               | 34  | 21.4 |
| agricultural fairs                      | 26  | 16.4 |
| others                                  | 12  | 7.5  |

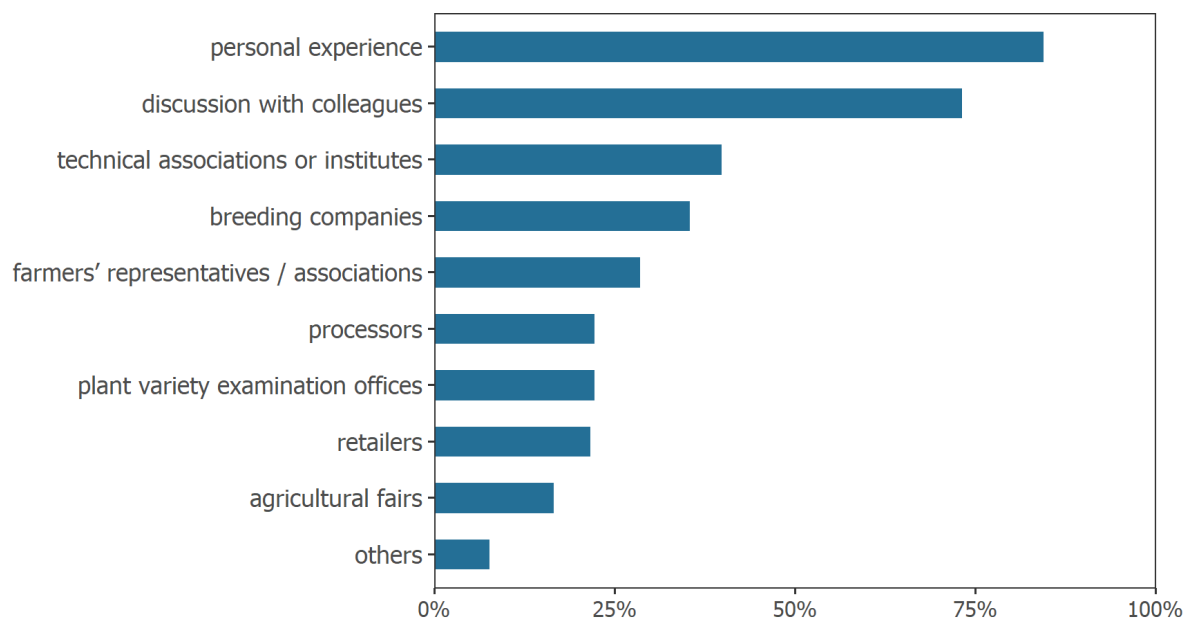

## The Netherlands: Which source of information do you use in your choice of variety?

| N=93                                    | n  | %    |
|-----------------------------------------|----|------|
| personal experience                     | 77 | 82.8 |
| breeding companies                      | 50 | 53.8 |
| retailers                               | 50 | 53.8 |
| discussion with colleagues              | 48 | 51.6 |
| processors                              | 28 | 30.1 |
| agricultural fairs                      | 15 | 16.1 |
| farmers' representatives / associations | 14 | 15.1 |
| technical associations or institutes    | 8  | 8.6  |
| others                                  | 6  | 6.5  |
| plant variety examination offices       | 5  | 5.4  |

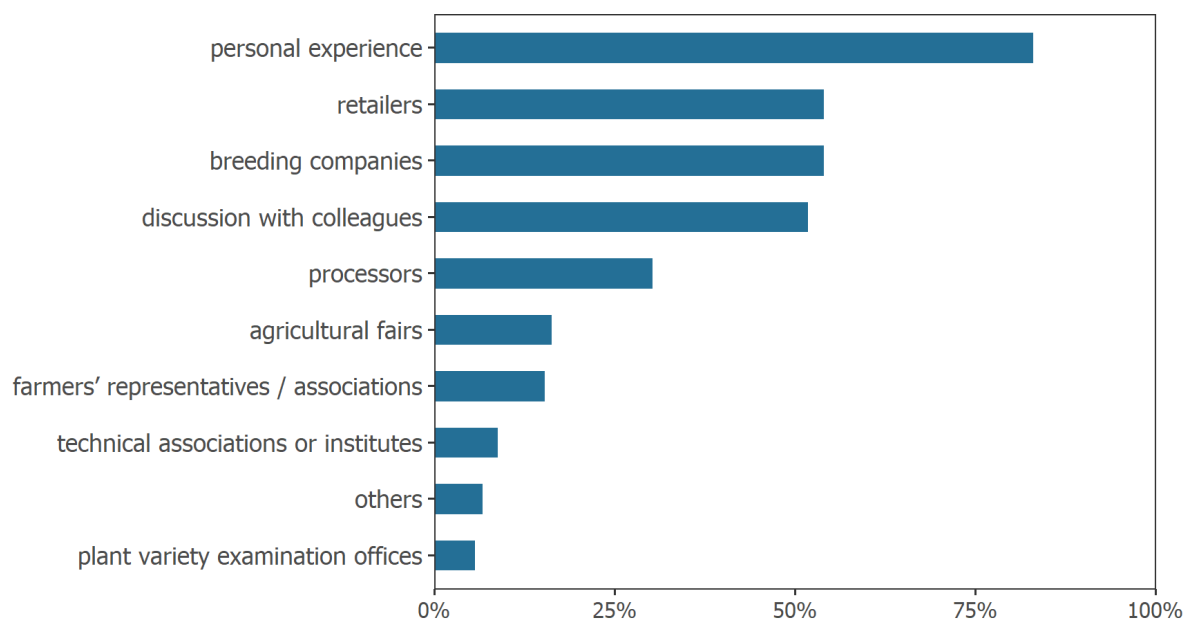

## Germany: Which source of information do you use in your choice of variety?

| N=79                                    | n  | %    |
|-----------------------------------------|----|------|
| personal experience                     | 68 | 86.1 |
| discussion with colleagues              | 65 | 82.3 |
| breeding companies                      | 35 | 44.3 |
| plant variety examination offices       | 33 | 41.8 |
| technical associations or institutes    | 29 | 36.7 |
| retailers                               | 27 | 34.2 |
| processors                              | 26 | 32.9 |
| farmers' representatives / associations | 24 | 30.4 |
| agricultural fairs                      | 13 | 16.5 |
| others                                  | 8  | 10.1 |

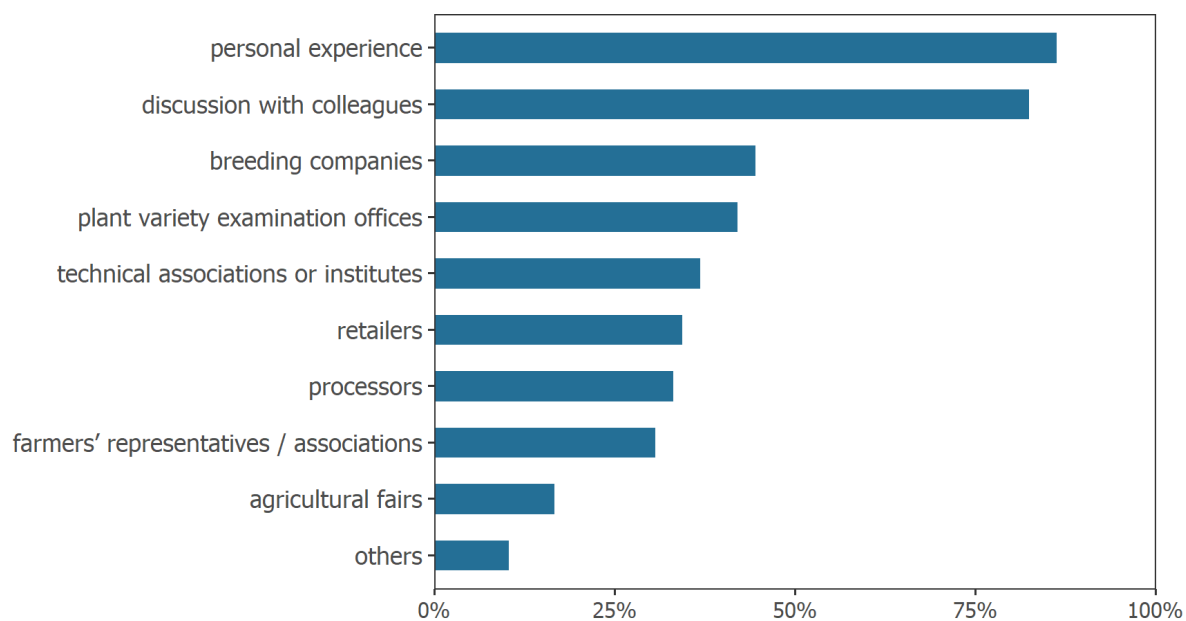

## France: Which source of information do you use in your choice of variety?

| N=57                                    | n  | %    |
|-----------------------------------------|----|------|
| personal experience                     | 39 | 68.4 |
| plant variety examination offices       | 35 | 61.4 |
| processors                              | 25 | 43.9 |
| technical associations or institutes    | 23 | 40.4 |
| discussion with colleagues              | 21 | 36.8 |
| breeding companies                      | 21 | 36.8 |
| farmers' representatives / associations | 9  | 15.8 |
| retailers                               | 7  | 12.3 |
| others                                  | 3  | 5.3  |
| agricultural fairs                      | 1  | 1.8  |

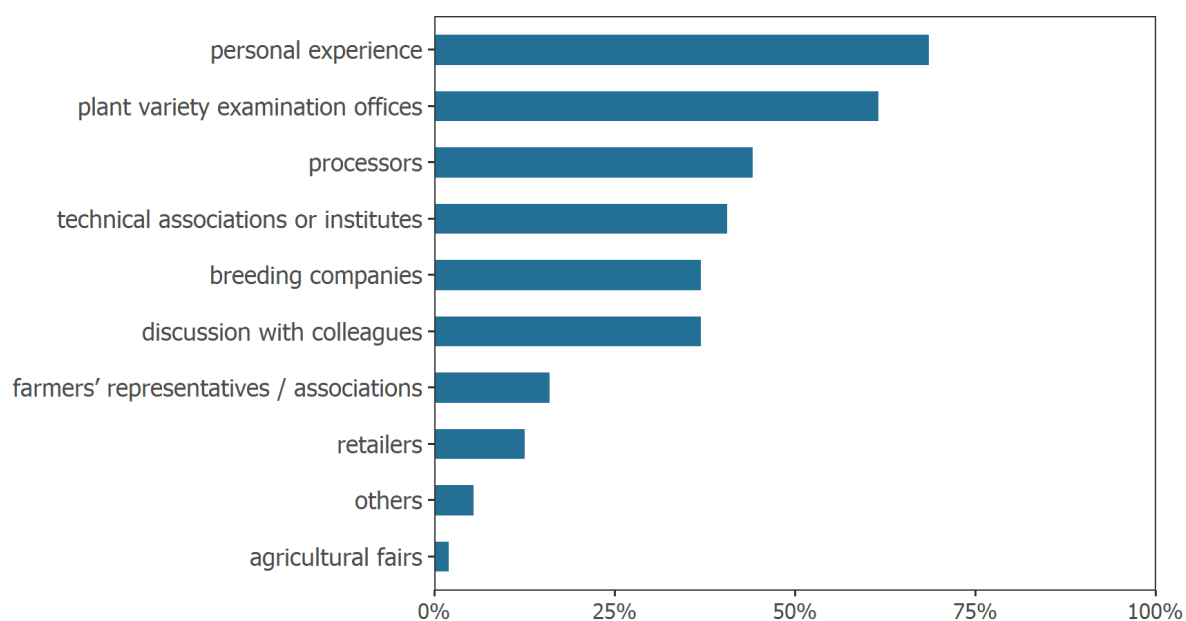

## Switzerland: Which source of information do you use in your choice of variety?

| <b>N=53</b>                             | <b>n</b> | <b>%</b> |
|-----------------------------------------|----------|----------|
| personal experience                     | 43       | 81.1     |
| plant variety examination offices       | 28       | 52.8     |
| processors                              | 28       | 52.8     |
| discussion with colleagues              | 25       | 47.2     |
| retailers                               | 21       | 39.6     |
| breeding companies                      | 16       | 30.2     |
| technical associations or institutes    | 13       | 24.5     |
| agricultural fairs                      | 5        | 9.4      |
| farmers' representatives / associations | 5        | 9.4      |
| others                                  | 3        | 5.7      |

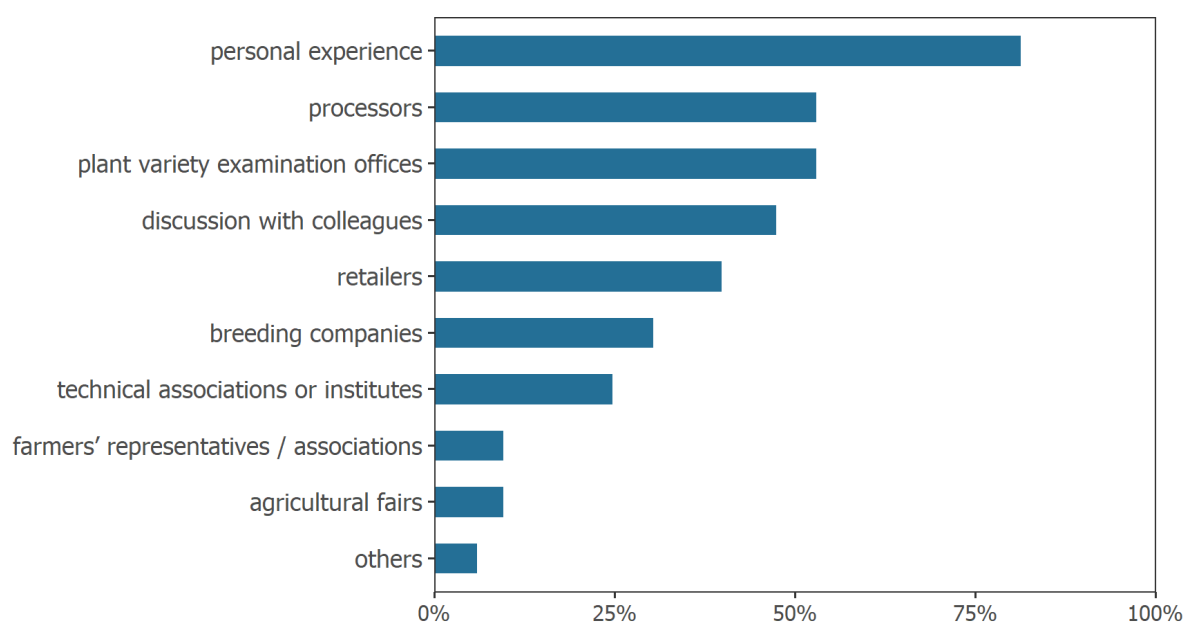

## Slovenia: Which source of information do you use in your choice of variety?

| <b>N=36</b>                             | <b>n</b> | <b>%</b> |
|-----------------------------------------|----------|----------|
| personal experience                     | 29       | 80.6     |
| plant variety examination offices       | 23       | 63.9     |
| technical associations or institutes    | 12       | 33.3     |
| discussion with colleagues              | 9        | 25.0     |
| agricultural fairs                      | 8        | 22.2     |
| breeding companies                      | 5        | 13.9     |
| retailers                               | 4        | 11.1     |
| farmers' representatives / associations | 3        | 8.3      |
| processors                              | 1        | 2.8      |
| others                                  | 1        | 2.8      |

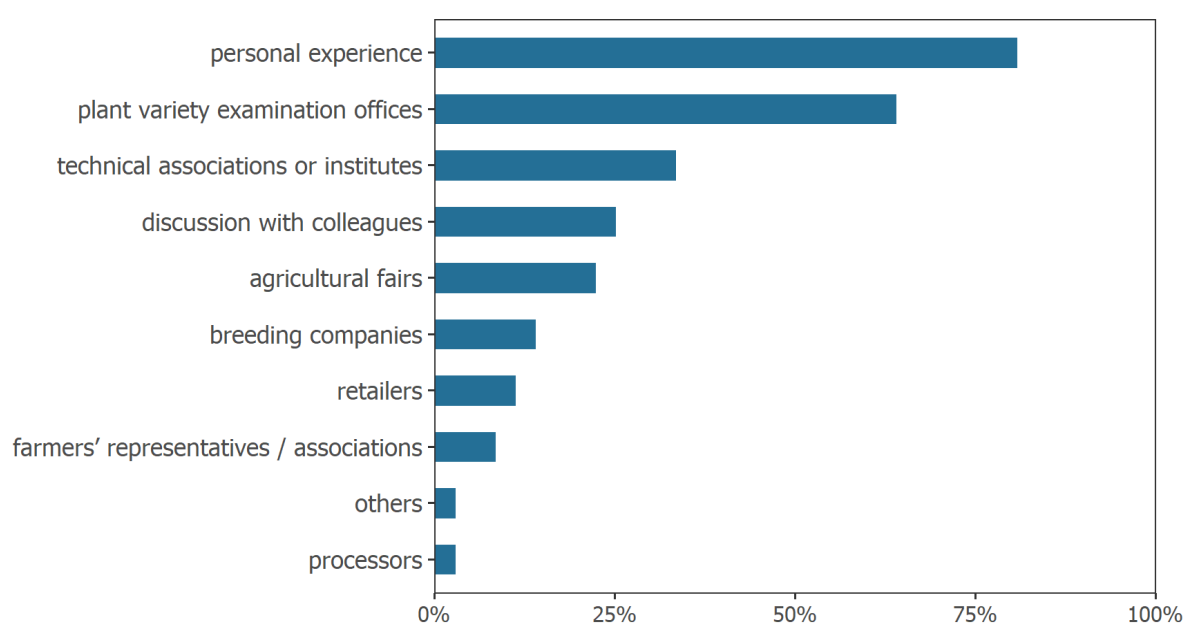

## Belgium: Which source of information do you use in your choice of variety?

| N=21                                    | n  | %    |
|-----------------------------------------|----|------|
| personal experience                     | 18 | 85.7 |
| plant variety examination offices       | 13 | 61.9 |
| discussion with colleagues              | 11 | 52.4 |
| technical associations or institutes    | 10 | 47.6 |
| processors                              | 10 | 47.6 |
| agricultural fairs                      | 6  | 28.6 |
| farmers' representatives / associations | 6  | 28.6 |
| breeding companies                      | 5  | 23.8 |
| retailers                               | 5  | 23.8 |
| others                                  | 1  | 4.8  |

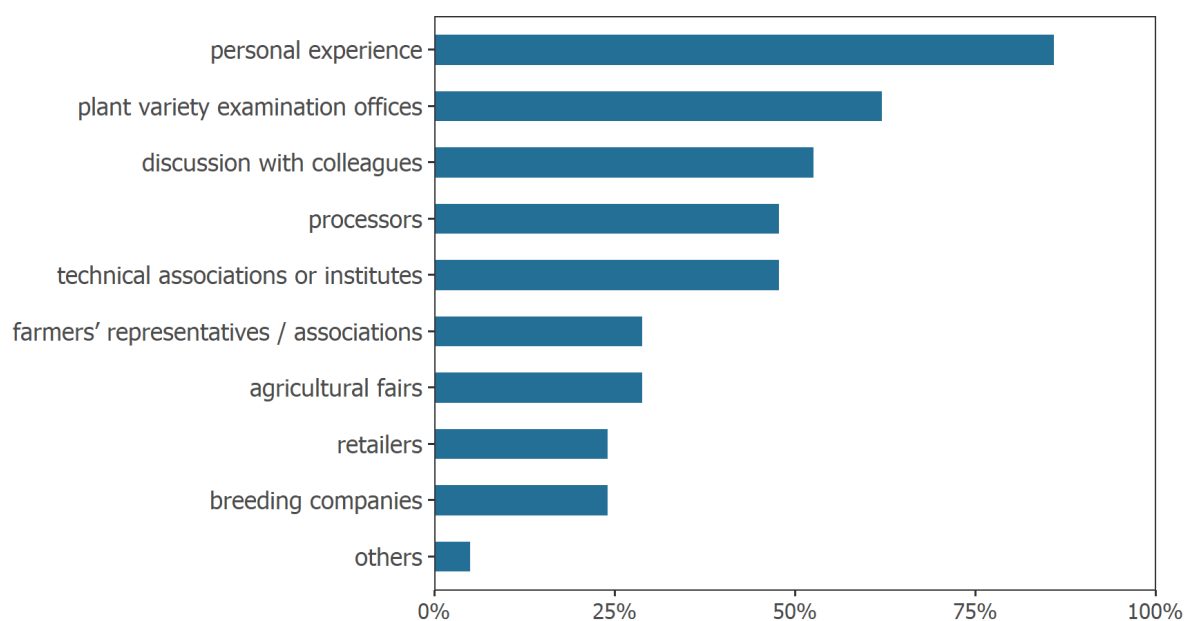

## Poland: Which source of information do you use in your choice of variety?

| N=19                                    | n  | %    |
|-----------------------------------------|----|------|
| personal experience                     | 15 | 78.9 |
| breeding companies                      | 10 | 52.6 |
| plant variety examination offices       | 7  | 36.8 |
| discussion with colleagues              | 6  | 31.6 |
| technical associations or institutes    | 6  | 31.6 |
| agricultural fairs                      | 6  | 31.6 |
| processors                              | 5  | 26.3 |
| others                                  | 3  | 15.8 |
| farmers' representatives / associations | 2  | 10.5 |
| retailers                               | 1  | 5.3  |

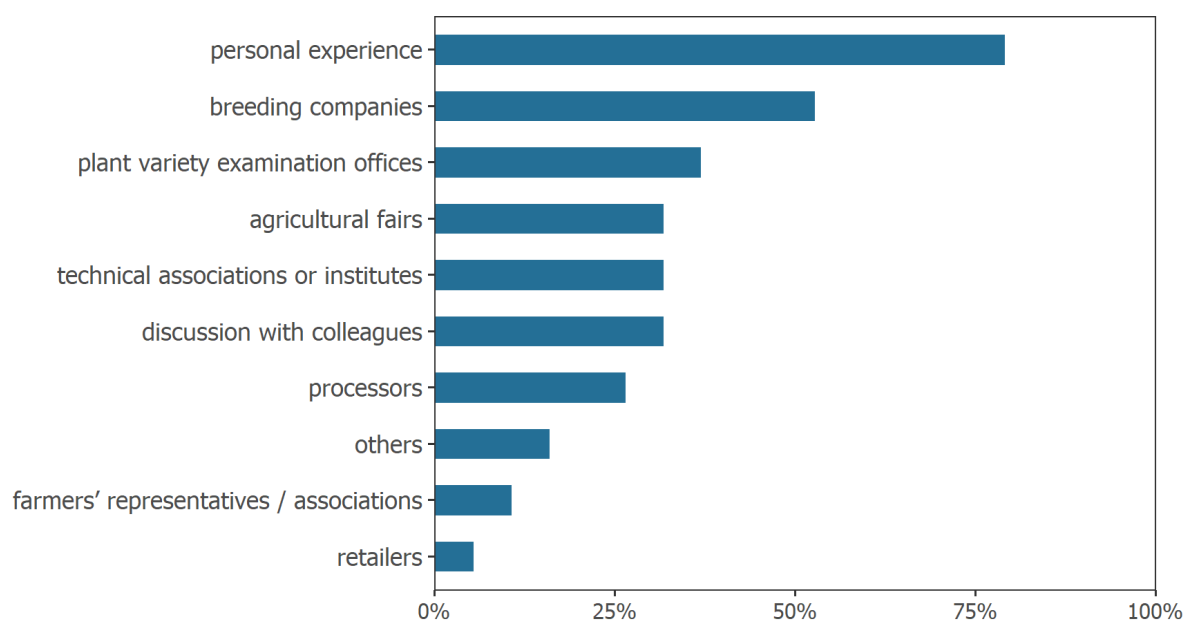

## Spain: Which source of information do you use in your choice of variety?

| N=15                                    | n  | %    |
|-----------------------------------------|----|------|
| personal experience                     | 11 | 73.3 |
| technical associations or institutes    | 7  | 46.7 |
| processors                              | 7  | 46.7 |
| discussion with colleagues              | 5  | 33.3 |
| farmers' representatives / associations | 3  | 20.0 |
| plant variety examination offices       | 2  | 13.3 |
| breeding companies                      | 2  | 13.3 |
| agricultural fairs                      | 2  | 13.3 |
| others                                  | 1  | 6.7  |
| retailers                               | 0  | 0.0  |

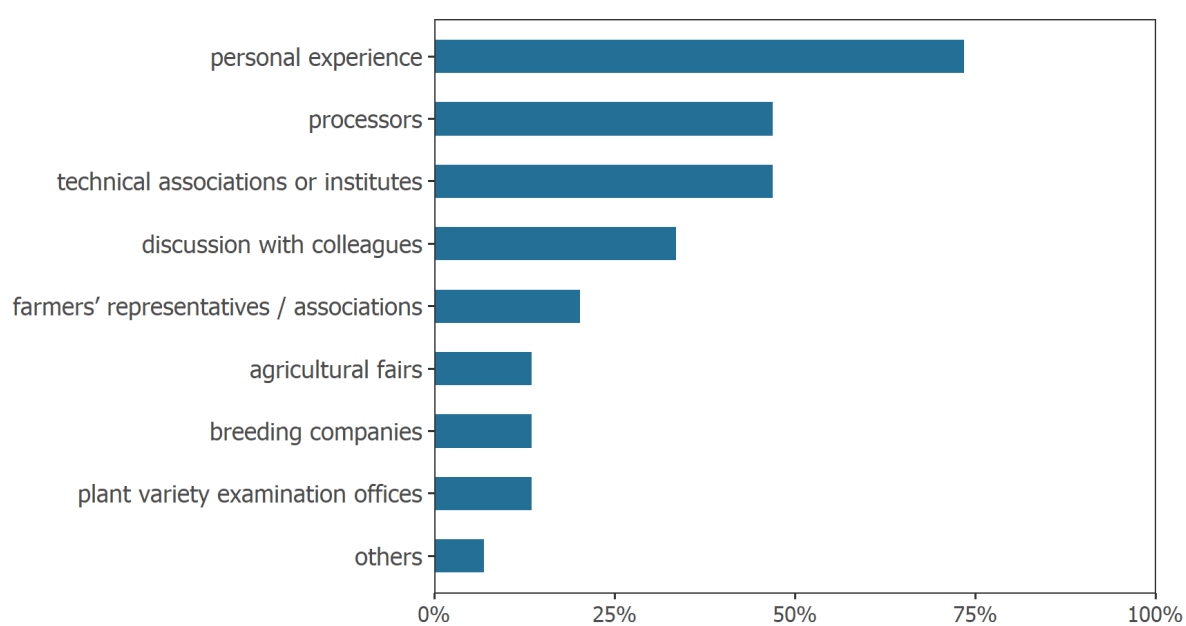

Supplement: s1 [file s1 › S3_Country-specific answers for Q7.pdf]
