# Supplementary material for: Farmers Feel the Climate Change: Variety Choice as an Adaptation Strategy of European Potato Farmers
Source: MDPI journal article supplement (doi:10.3390/cli11090189), 2023-09-09
Supplement: s1 [file s1]

Archive with 3 entries (3 files):
- S1_Questionnaire.pdf
- S2_Detailed Answers.pdf
- S3_Country-specific answers for Q7.pdf
